# Supplementary material
Source: Springer Nature journal article supplement (https://www.springermedizin.de/resource/supplementary/12936_2011_2001_MOESM5_ESM.pdf/9543102)

## Autopsy Series January 1999 to February 2001

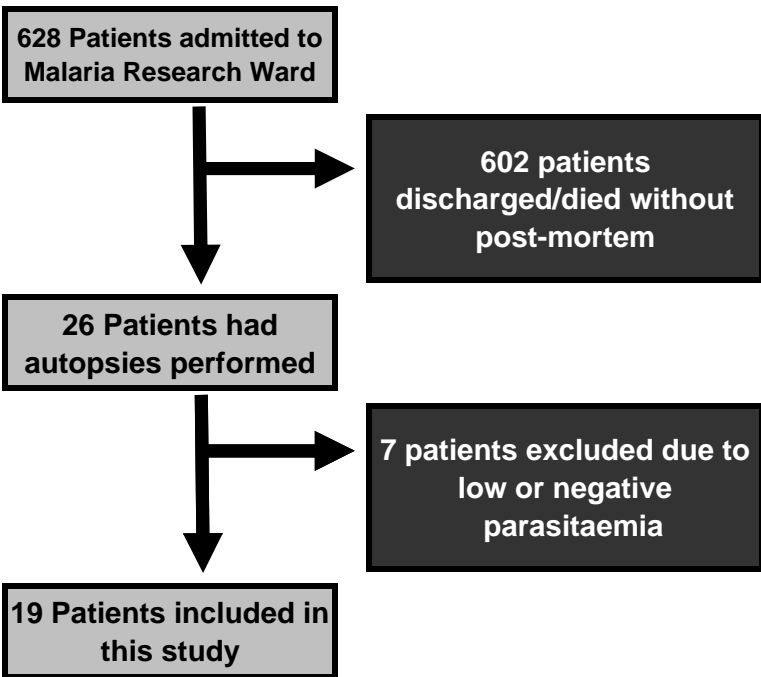

## Clinical Series January 2009 - June 2009

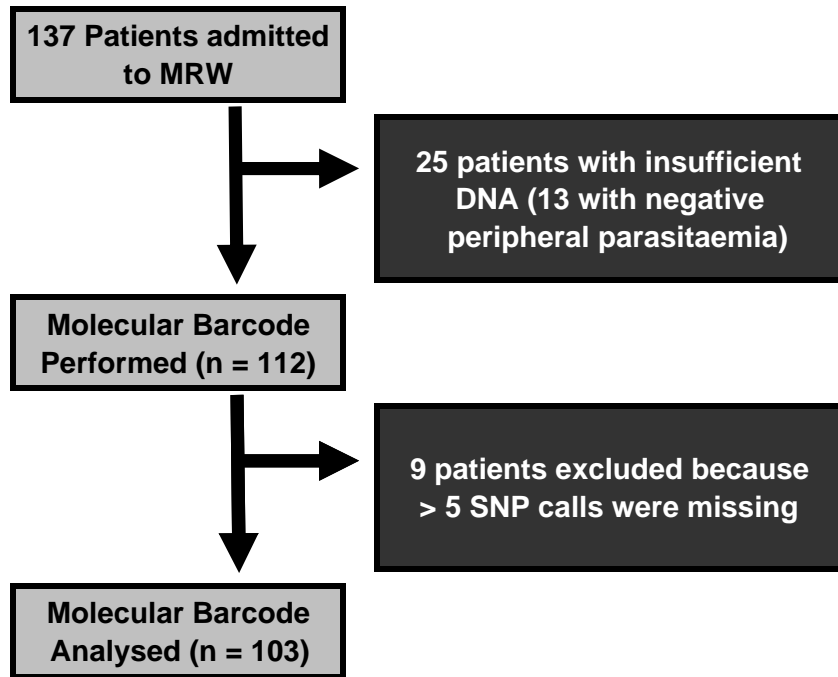

Supplement: MOESM5 [file 9543102]
